# Supplementary material
Source: publisher figshare collection journal article supplement (https://gsapubs.figshare.com/ndownloader/files/23300828)
Supplement: Supplementary file 1 [file 23300828]

## Sheet: Sheet1
Report Date: 16/9/2015					Analyte Symbol	Total Carbon	Organic Carbon (calc)	Organic Carbon (calc)	Mo	Mo	Al	Al	Fe	Mn	Re	Re	Fe/Al	Mo/Al
					Unit Symbol	%	%	%	ppm	ppm	%	ppm	%	ppm	ppm	ppb
				Formation - Environment	Detection Limit	0.01	0.5	revised	1	revised	0.01	calc	0.01	1	0.001	revised
Sample Type	Sample No.	UWI	Depth (m)		Analysis Method	CS	IR		TD-ICP		TD-ICP		INAA	TD-ICP	TD-MS
Highly Bioturbated Silty and Sandy Mudstone	1	00/4-11-66-21W5	1396	Viking Lower Offshore		0.91	0.6	0.6	< 1	0.5	8.62	86200	3.68	218	0.004	4	0.426914	5.80046e-06
	2	00/4-11-66-21W5	1392.7	Viking Lower Offshore		0.97	0.7	0.7	< 1	0.5	4.97	49700	2.43	89	< 0.001	0.5	0.488934	1.00604e-05
	3	00/4-11-66-21W5	1386.7	Viking Lower Offshore		1.22	0.7	0.7	< 1	0.5	7.21	72100	2.87	94	0.002	2	0.398058	6.93481e-06
	4	00/4-11-66-21W5	1379	Viking Lower Offshore		1.67	1.1	1.1	2	2	5.7	57000	2.73	93	0.004	4	0.478947	3.50877e-05
	5	00/10-05-65-20W5	1463.3	Viking Lower Offshore		* No Geochemical analysis
	6	00/10-05-65-20W5	1456.1	Viking Lower Offshore		* No Geochemical analysis
	7	02/10-05-65-20W5	1437.7	Viking Lower Offshore		1.37	0.9	0.9	< 1	0.5	7.05	70500	2.7	125	0.004	4	0.382979	7.0922e-06
	8	00/12-07-38-24W4	1431.4	Viking Lower Offshore		* No Geochemical analysis
	9	00/10-15-62-19W5	1672.8	Viking Upper Offshore		1.09	0.6	0.6	< 1	0.5	5.49	54900	2.56	132	< 0.001	0.5	0.466302	9.10747e-06
	10	00/10-15-62-19W5	1667.1	Viking Upper Offshore		8.12	0.7	0.7	< 1		2.14	21400	27.9	1740	< 0.001		13.0374	0	Fe/Al ratio not included in graphs (suspicious)
	11	00/10-15-62-19W5	1663.8	Viking Upper Offshore		1.67	1	1	< 1	0.5	4.51	45100	2.35	75	< 0.001	0.5	0.521064	1.10865e-05
	12	00/10-15-62-19W5	1663.3	Viking Upper Offshore		0.59	< 0.5	0.25	2	2	8.87	88700	2.25	56	0.003	3	0.253664	2.25479e-05
	13	00/4-11-66-21W5	1380.8	Viking Upper Offshore		1.01	< 0.5	0.25	3	3	3.96	39600	2.76	179	0.004	4	0.69697	7.57576e-05
	14	00/2-28-63-20W5	1563.2	Viking Upper Offshore		0.67	< 0.5	0.25	1	1	2.8	28000	1.91	102	< 0.001	0.5	0.682143	3.57143e-05
	15	00/2-28-63-20W5	1561	Viking Upper Offshore		1.15	0.7	0.7	3	3	4.22	42200	3.09	209	0.002	2	0.732227	7.109e-05
	16	00/2-28-63-20W5	1556.8	Viking Upper Offshore		1.69	1.1	1.1	1	1	5.72	57200	2.08	112	0.008	8	0.363636	1.74825e-05
	17	00/2-28-63-20W5	1559	Viking Upper Offshore		0.54	< 0.5	0.25	2	2	13.4	134000	3.08	289	< 0.001	0.5	0.229851	1.49254e-05
	18	02/10-05-65-20W5	1443.8	Viking Upper Offshore		1.29	0.8	0.8	< 1	0.5	6.39	63900	2.85	96	< 0.001	0.5	0.446009	7.82473e-06
	19	02/10-05-65-20W5	1431	Viking Upper Offshore		1.43	0.8	0.8	< 1	0.5	5.4	54000	2.65	108	0.016	16	0.490741	9.25926e-06
	20	00/12-07-38-24W4	1429.8	Viking Upper Offshore		* No Geochemical analysis
	21	00/12-07-38-24W4	1422.8	Viking Upper Offshore		* No Geochemical analysis
Unbioturbated and Low BI Mudstone	22	00/10-15-62-19W5	1656.1	Westgate Fm		2.15	1.2	1.2	< 1	0.5	7.14	71400	3.96	405	0.006	6	0.554622	7.0028e-06
	23	00/10-15-62-19W5	1657.7	Westgate Fm		1.24	0.8	0.8	5	5	4.88	48800	2.14	98	< 0.001	0.5	0.438525	0.000102459
	24	00/2-28-63-20W5	1551.8	Westgate Fm		2.01	1.2	1.2	< 1	0.5	7.56	75600	3.51	184	< 0.001	0.5	0.464286	6.61376e-06
	25	00/12-07-38-24W4	1415.6	Westgate Fm		* No Geochemical analysis
	26	00/4-11-66-21W5	1401.7	Viking Blk Shl		1.23	0.5	0.5	1	1	9.96	99600	4.13	338	0.002	2	0.414659	1.00402e-05
	27	00/4-11-66-21W5	1401.2	Viking Blk Shl		1.32	0.8	0.8	3	3	9.73	97300	3.1	144	< 0.001	0.5	0.318602	3.08325e-05
	28	00/4-11-66-21W5	1396.6	Viking Blk Shl		0.86	0.6	0.6	< 1	0.5	8.1	81000	3.51	176	< 0.001	0.5	0.433333	6.17284e-06
	29	00/4-11-66-21W5	1393	Viking Blk Shl		1.54	0.8	0.8	< 1	0.5	7.3	73000	3.22	172	0.008	8	0.441096	6.84932e-06
	30	00/4-11-66-21W5	1390.3	Viking Blk Shl		1.43	1	1	< 1	0.5	4.76	47600	2.45	146	< 0.001	0.5	0.514706	1.05042e-05
	31	00/4-11-66-21W5	1389.3	Viking Blk Shl		1.31	0.9	0.9	< 1	0.5	6.63	66300	2.7	100	< 0.001	0.5	0.40724	7.54148e-06
	32	00/4-11-66-21W5	1387.6	Viking Blk Shl		1.32	0.8	0.8	1	1	6.43	64300	3.24	120	0.006	6	0.503888	1.55521e-05
	33	00/2-28-63-20W5	1579.4	Joli Fou Blk Shl		0.84	< 0.5	0.25	< 1	0.5	8.89	88900	3.69	212	0.004	4	0.415073	5.6243e-06
	34	00/2-28-63-20W5	1571.6	Joli Fou Blk Shl		1.77	1	1	1	1	7.29	72900	3.65	1060	< 0.001	0.5	0.500686	1.37174e-05
	35	00/10-15-62-19W5	1686.4	Joli Fou Blk Shl		0.79	< 0.5	0.25	< 1	0.5	8.53	85300	3.1	217	0.002	2	0.363423	5.86166e-06
	36	00/10-15-62-19W5	1684.8	Joli Fou Blk Shl		0.82	< 0.5	0.25	< 1	0.5	8.34	83400	3.99	238	< 0.001	0.5	0.478417	5.9952e-06
		= Values below detection limit of instrument are picked halfway between minimum detection limit and 0
